# Supplementary material for: A bionanocomposite-modified glassy carbon electrode for the determination of 4,4′-methylene diphenyl diamine
Source: Royal Society of Chemistry journal article supplement (doi:10.1039/c8ay01376d), 2018-01-01
Supplement: c8ay01376d1.pdf [file c8ay01376d1.pdf]

## Bionanocomposite-modified glassy carbon electrode for the determination of 4,4'-methylene diphenyl diamine

Masoud Ghaani,<sup>a</sup> Flavia Pucillo,<sup>a</sup> Richard T. Olsson,<sup>b</sup> Matteo Scampicchio<sup>c</sup> and Stefano Farris<sup>\*a,d</sup>

<sup>a</sup> DeFENS, Department of Food, Environmental and Nutritional Sciences, Food Packaging Lab, University of Milan, via Celoria 2 – I-20133 Milan, Italy.

<sup>b</sup> Department of Fibre and Polymer Technology, School of Chemical Science and Engineering, KTH Royal Institute of Technology, Teknikringen 56, SE-100 44 Stockholm, Sweden.

<sup>c</sup> Free University of Bolzano, Piazza Università 1 – 39100 Bolzano, Italy.

<sup>d</sup> INSTM, National Consortium of Materials Science and Technology, Local Unit University of Milan, via Celoria 2 – I-20133 Milan, Italy

† Corresponding author. Tel.: +39 0250316805; Fax: +39 0250316672. Email address: stefano.farris@unimi.it (S. Farris).

### Electronic Supplementary Information

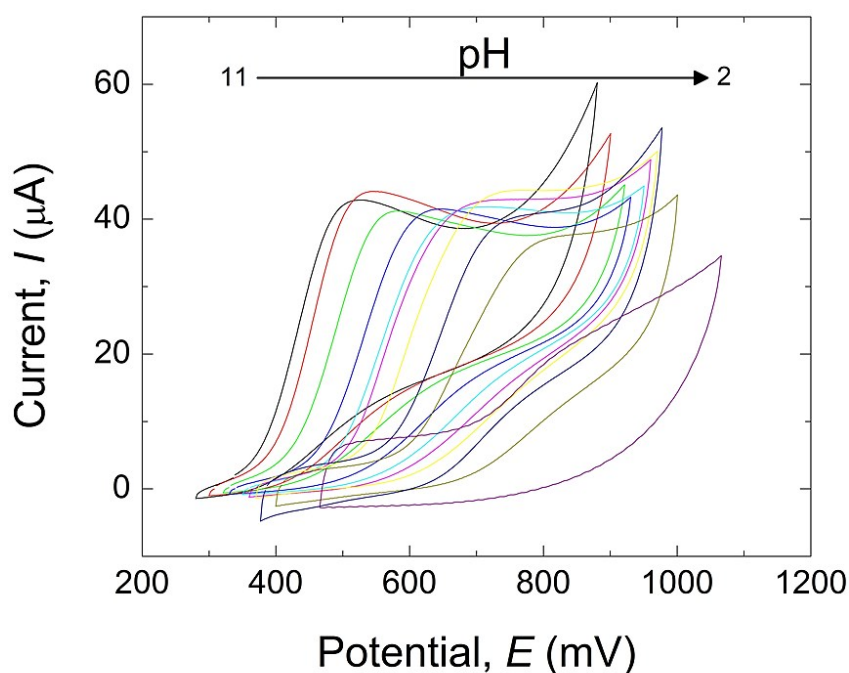

Figure S1. Cyclic voltammograms at the MWCNTs-CS-AuNPs/GCE surface at different pH values (from 2 to 11) in a 0.1 M B-R buffer solution containing 500 µM of MDA.

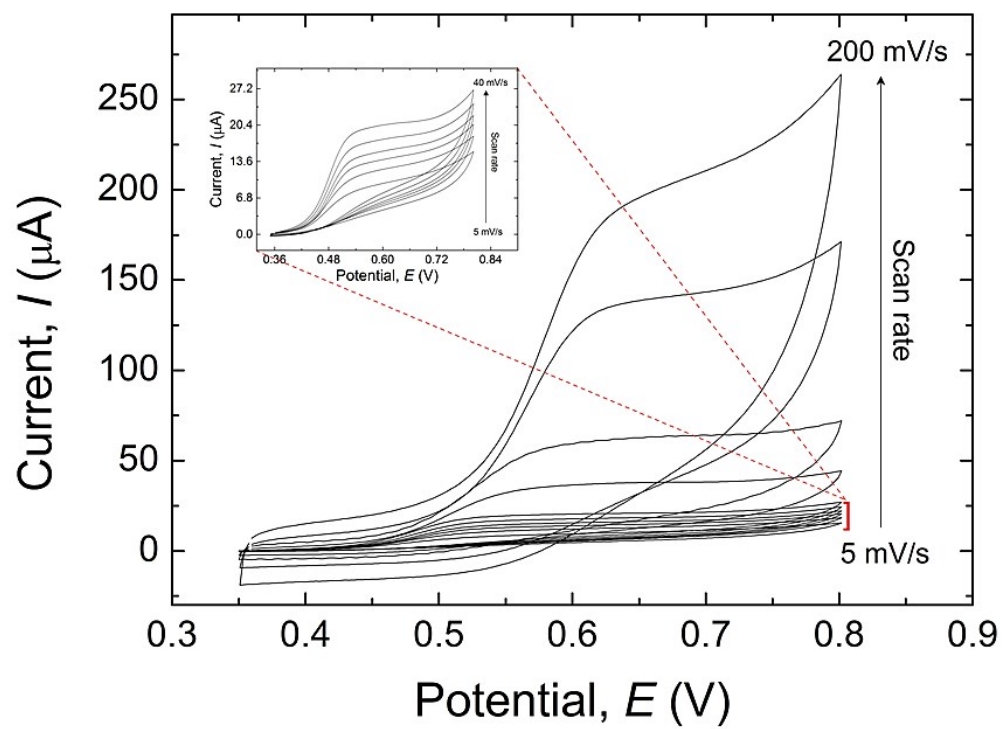

Figure S2. Cyclic voltammograms of MWCNTs-CS-AuNPs/GCE in a B-R buffer solution (0.1 M, pH 10.0) containing 500  $\mu\text{M}$  MDA at different scan rates (5–200 mV/s). For clarity, the 5–40 mV/s scan rate range is shown in the inset.
